# Supplementary material
Source: PubMed Central journal article supplement (PMC4277767)

## Supporting Information

*Includes Supplementary Figure Legends and Supplementary Figures S1 – S4.*

### Supplementary Figure Legends

**Supplementary Figure S1. Yeast expressing an AD-exPDZb1 fusion show reduced growth rates.** Constructs containing a C-terminal extension after the ePDZb1 domain (exPDZb1) show normal growth in yeast as a Gal4BD fusion. When fused to Gal4AD in a higher-expressing vector, exPDZb1 retains some toxicity, indicated by a reduction in growth rate.

**Supplementary Figure S2. Comparison of TULIP variants for control of yeast transcription.** (a)  $\beta$ -galactosidase reporter activity of yeast expressing BD-exPDZb1 and AD-LOVpep variants (unmodified (wt), V416I, and 3xA (T406A, T407A, I532A)). Samples were incubated in the dark ('D') or exposed to blue light pulses (1s 461 nm pulse every 45s) for 4 hours. (b)  $\beta$ -galactosidase reporter activity of yeast expressing BD-LOVpep and AD-exPDZb1. Samples were treated as in (a).

**Supplementary Figure S3. Examination of crossreactivity of blue and red light systems.** GalBD-CRY or TULIP bait constructs show no crossreactivity with other prey constructs and respond specifically to blue light. Shown are AH109 yeast expressing indicated bait (GalBD-CRY2, GalBD-exPDZb1, or vector control) and prey (GalAD-CIB1, GalAD-LOVpep, GalAD-PIF3, or vector) constructs grown on SD –Trp/-Leu/-His +3mM 3-AT selective plates under dark, blue light, or red light conditions for three days. EV indicates empty vector control (pDBTrp or pGADT7rec for bait or prey, respectively).

**Supplementary Figure S4. Optimization of CRY2/CIB-mediated activation of yeast MAP kinase pathway.** Yeast expressing indicated Mid2 and Ste5 $\Delta$ N fusion constructs with various full length and truncated versions of CRY2 and CIB1 were evaluated for light-dependent activation of a PFUS1-DsRed reporter. Samples were kept in the dark or exposed to light for 5 hours before imaging.

Supplementary Figure S1, Pathak et al

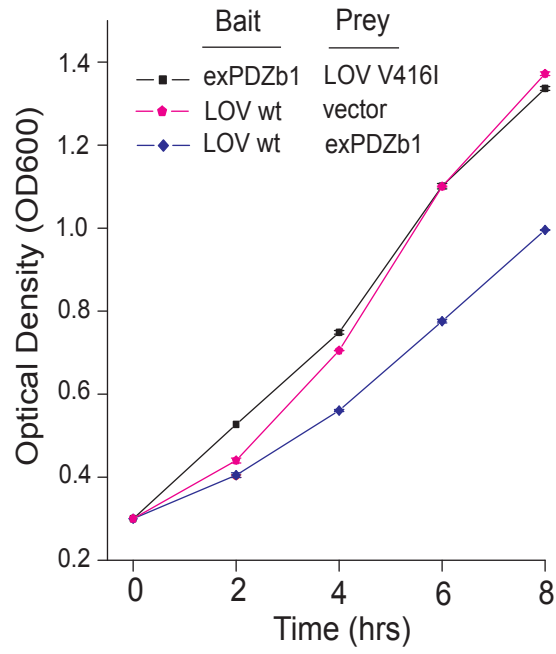

Supplementary Figure S2, Pathak et al.

**a**

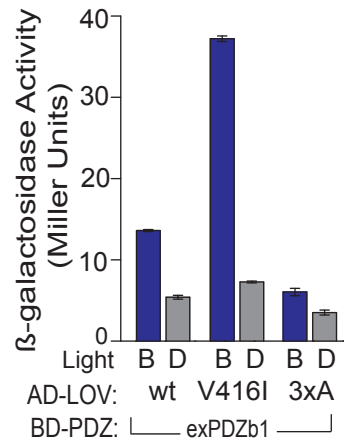

**b**

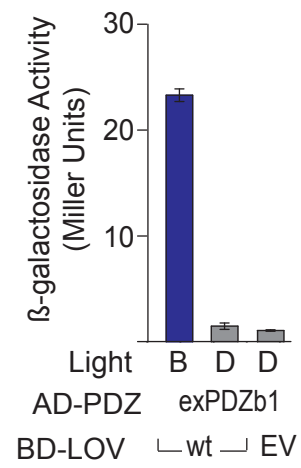



Figure S4, Pathak et al

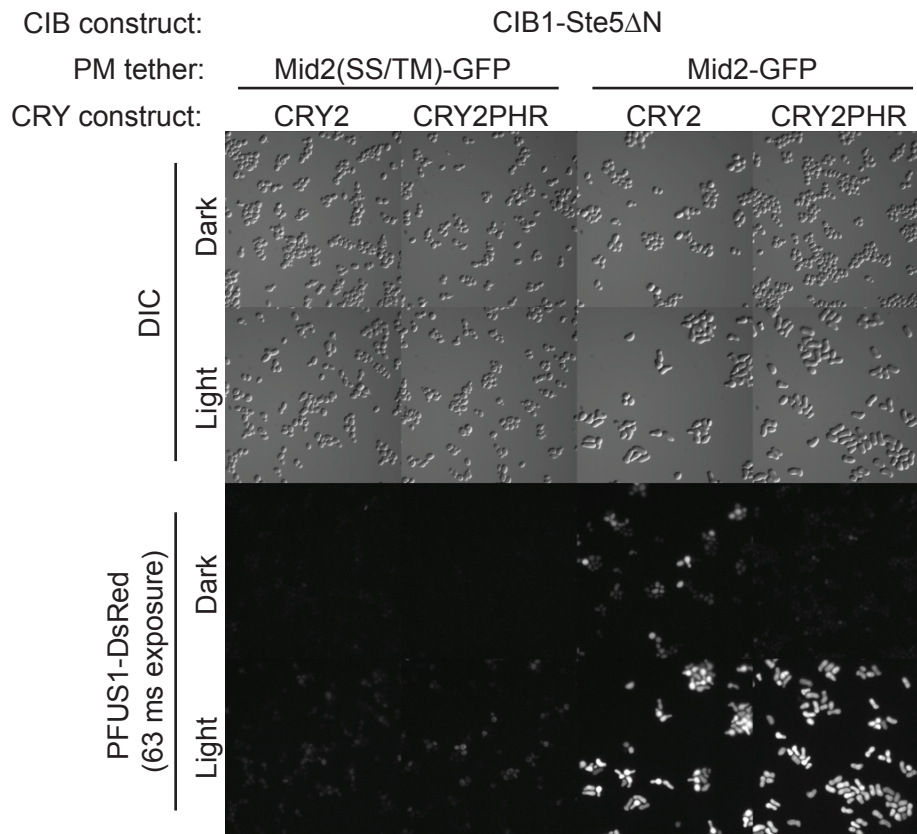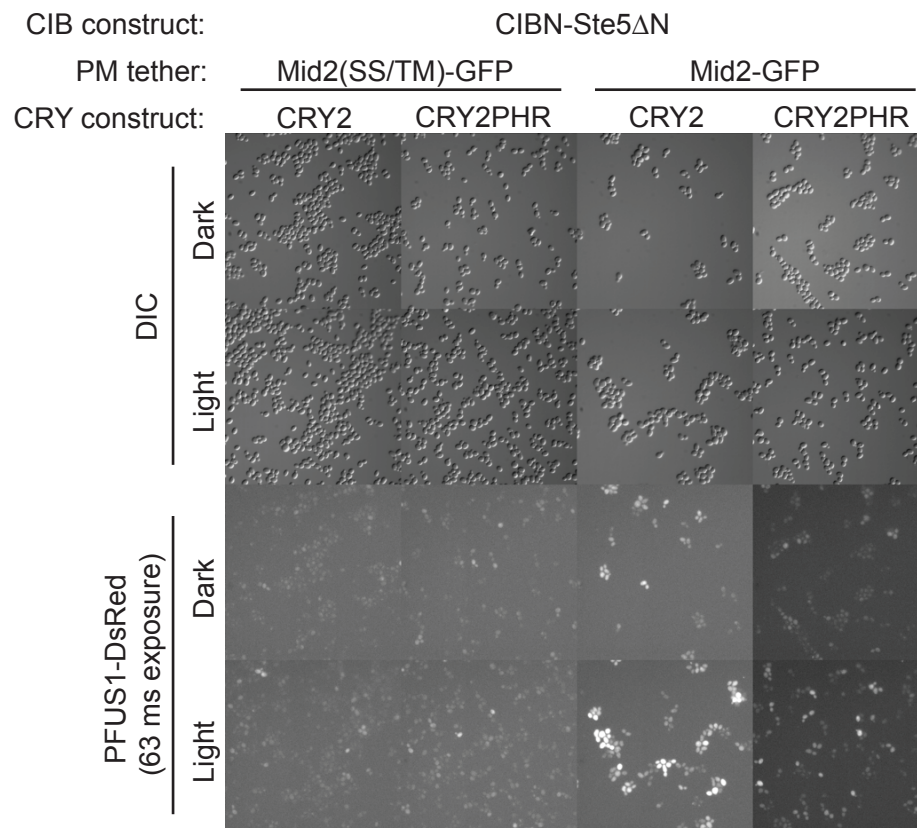

Supplement: sb500291r_si_001.pdf [file sb500291r_si_001.pdf]
